# Supplementary material
Source: PubMed Central journal article supplement (PMC4567625)
Supplement: IAI.00888-15_zii999091404so1.pdf [file IAI.00888-15_zii999091404so1.pdf]

A

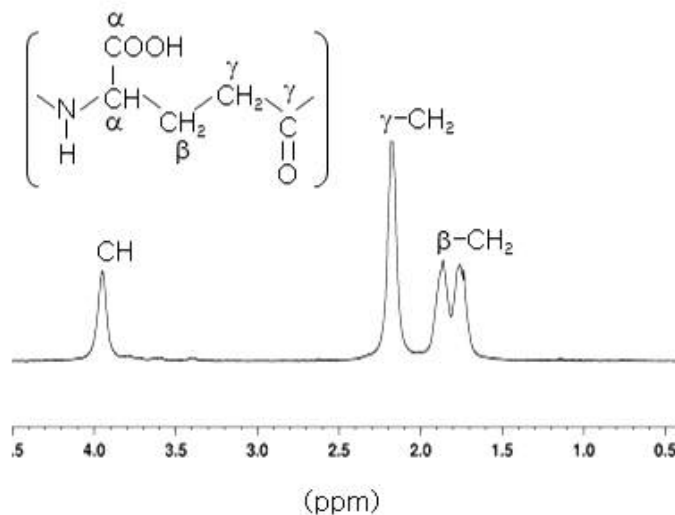

B

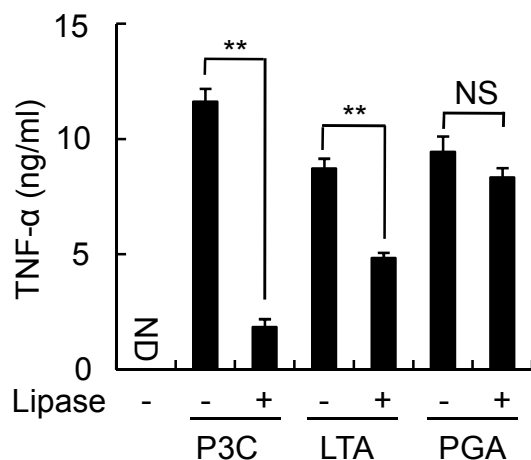

C

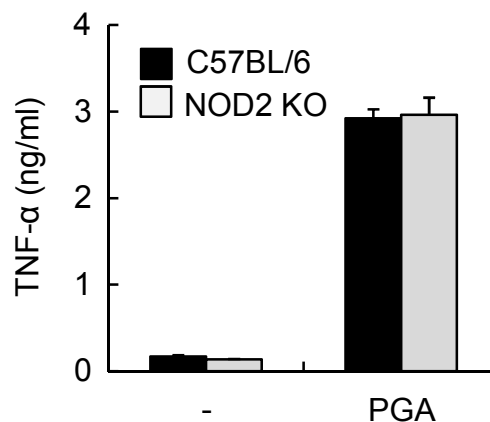

**Fig. S1. Confirmation of the PGA purity.** A. One-dimensional  $^1\text{H}$  NMR analysis of purified PGA was performed using Varian 400 MHz spectrometer. NMR analysis of purified PGA demonstrated a conventional peak pattern of  $\gamma$ -PGA with no additional peak, which indicates high purity of PGA. B. RAW 264.7 cells were stimulated for 24 h with 10 ng/ml P3C, 3  $\mu\text{g/ml}$  LTA, and 100  $\mu\text{g/ml}$  PGA after treatment with 200  $\mu\text{g/ml}$  lipase for 12 h at 37°C. TNF- $\alpha$  concentrations were measured by ELISA. C. BMDMs from C57BL/6 and NOD2-KO C57BL/6 mice were stimulated with 100  $\mu\text{g/ml}$  PGA for 24 h. Cell culture supernatants were collected and TNF- $\alpha$  concentrations were measured by ELISA. Data are the mean values  $\pm$  S.D. of triplicate samples. Statistical significance was examined with  $t$ -test. \*  $P < 0.01$  compared with each stimulated group. The results shown are representative of three separate experiments. NS, not significant.
